# Supplementary material for: Interventions to reintroduce or increase assisted vaginal births: a systematic review of the literature
Source: PubMed Central journal article supplement (PMC9930566; doi:10.1136/bmjopen-2022-070640), 2023-02-14
Supplement: bmjopen-2022-070640supp004.pdf [file bmjopen-2022-070640supp004.pdf]

## Supplementary file 4. Assessment of the quality of 16 included studies

### Risk of bias of 13 non-randomized intervention studies<sup>a</sup>

| Study                    | Bias due to confounding | Bias in selection of participants into the study | Bias in classification of interventions | Bias due to deviations from intended interventions | Bias due to missing data | Bias in measurement of outcomes | Bias in selection of the result | Overall bias <sup>b</sup> |
|--------------------------|-------------------------|--------------------------------------------------|-----------------------------------------|----------------------------------------------------|--------------------------|---------------------------------|---------------------------------|---------------------------|
| Bardos 2017              | Low                     | Low                                              | Low                                     | Low                                                | Low                      | Low                             | Low                             | Low                       |
| Becker 2020              | Moderate                | Low                                              | Low                                     | Low                                                | Low                      | Low                             | Low                             | Moderate                  |
| Berglund 2010            | Moderate                | Low                                              | Low                                     | Low                                                | Low                      | Low                             | Low                             | Moderate                  |
| Cottrell 2021            | Serious                 | Serious                                          | Low                                     | Low                                                | Low                      | Low                             | Low                             | Serious                   |
| Dmello 2021              | Moderate                | Low                                              | Low                                     | Low                                                | Low                      | Low                             | Low                             | Moderate                  |
| Dominico 2018            | Serious                 | Low                                              | Low                                     | Low                                                | Low                      | Low                             | Low                             | Serious                   |
| Geelhoed 2018            | Serious                 | Low                                              | Low                                     | Low                                                | Low                      | Low                             | Low                             | Serious                   |
| Mogilevkina 2022         | Moderate                | Low                                              | Low                                     | Low                                                | Low                      | Low                             | Low                             | Moderate                  |
| Nolens 2016              | Serious                 | Low                                              | Low                                     | Low                                                | Low                      | Low                             | Low                             | Moderate                  |
| Skinner 2017             | Low                     | Moderate                                         | Low                                     | Low                                                | Low                      | Low                             | Low                             | Moderate                  |
| Solt 2011                | Moderate                | Low                                              | Low                                     | Low                                                | Low                      | Low                             | Low                             | Moderate                  |
| Sorensen 2010            | Moderate                | Low                                              | Low                                     | Low                                                | Low                      | Low                             | Low                             | Moderate                  |
| Takeda 2018 <sup>c</sup> | -                       | -                                                | -                                       | -                                                  | -                        | -                               | -                               | -                         |

<sup>a</sup> Based on Risk of Bias for Non-Randomised Studies of Interventions (ROBINS-I) tool.

<sup>b</sup> Interpretation of overall risk of bias.

<sup>c</sup>Takeda 2018: Risk of bias not assessed due to insufficient information.

**Low risk of bias:** The study is comparable to a well performed randomised trial.

**Moderate risk of bias:** The study provides sound evidence for a nonrandomized study but cannot be considered comparable to a well performed randomised trial.

**Serious risk of bias:** The study has some important problems.

**Critical risk of bias:** The study is too problematic to provide any useful evidence and should not be included in any synthesis.

**No information:** No information on which to base a judgement about risk of bias.

Risk of bias of 3 randomized trials<sup>a</sup>

| Study                                                                                                                                                                                                                                                                                                                                                                                                                                         | Random sequence generation (selection bias) | Allocation concealment (selection bias) | Baseline outcome measurements | Baseline characteristics | Blinding of participants and personnel (performance bias) | Blinding of outcome assessment (detection bias) | Contamination | Incomplete outcome data (attrition bias) | Selective reporting (reporting bias) | Overall bias <sup>b</sup> |
|-----------------------------------------------------------------------------------------------------------------------------------------------------------------------------------------------------------------------------------------------------------------------------------------------------------------------------------------------------------------------------------------------------------------------------------------------|---------------------------------------------|-----------------------------------------|-------------------------------|--------------------------|-----------------------------------------------------------|-------------------------------------------------|---------------|------------------------------------------|--------------------------------------|---------------------------|
| Ameh 2014                                                                                                                                                                                                                                                                                                                                                                                                                                     | Low                                         | Low                                     | Low                           | Low                      | Low                                                       | Low                                             | Low           | Low                                      | Low                                  | Low                       |
| Dumont 2013                                                                                                                                                                                                                                                                                                                                                                                                                                   | Low                                         | Low                                     | Low                           | Low                      | Low                                                       | Low                                             | Low           | Low                                      | Low                                  | Low                       |
| Gulmezoglu 2006                                                                                                                                                                                                                                                                                                                                                                                                                               | Low                                         | Low                                     | Low                           | Low                      | Low                                                       | Low                                             | Low           | Low                                      | Low                                  | Low                       |
| <sup>a</sup> Based on the Cochrane EPOC Risk of bias criteria for randomised trials.<br><sup>b</sup> Interpretation of overall risk of bias<br><br><b>Low risk of bias:</b> Low risk of bias for key quality domains (i.e. allocation sequence generation and concealment)<br><b>High risk of bias:</b> High risk of bias for one or more of the key domains<br><b>Unclear risk of bias:</b> Unclear risk of bias for one or more key domains |                                             |                                         |                               |                          |                                                           |                                                 |               |                                          |                                      |                           |
