# Supplementary material for: Interventions to reintroduce or increase assisted vaginal births: a systematic review of the literature
Source: PubMed Central journal article supplement (PMC9930566; doi:10.1136/bmjopen-2022-070640), 2023-02-14
Supplement: bmjopen-2022-070640supp005.pdf [file bmjopen-2022-070640supp005.pdf]

## Supplementary file 5. Baseline rates of assisted vaginal births and cesarean deliveries in studies included in the systematic review

| Baseline rates <sup>a</sup>                                | N of studies  | References                                                                                                                                                                                                                                                                                                                                                         |
|------------------------------------------------------------|---------------|--------------------------------------------------------------------------------------------------------------------------------------------------------------------------------------------------------------------------------------------------------------------------------------------------------------------------------------------------------------------|
| VE rates (N=14 studies, 15 data sets <sup>b</sup> )        |               |                                                                                                                                                                                                                                                                                                                                                                    |
| range                                                      | 0% to 8.7%    |                                                                                                                                                                                                                                                                                                                                                                    |
| < 1%                                                       | 8             | Ameh 2014 ( <a href="#">Kenya</a> ), Dmello 2021 ( <a href="#">Tanzania</a> ), Dominico 2018 ( <a href="#">Tanzania</a> ), Geelhoed 2018 ( <a href="#">Mozambique</a> ), Gulmezoglu 2006 ( <a href="#">Mexico</a> <sup>c</sup> ), Mogilevkina 2022 ( <a href="#">Ukraine</a> ), Nolens 2016 ( <a href="#">Uganda</a> ), Sorensen 2010 ( <a href="#">Tanzania</a> ) |
| 1- 4 %                                                     | 3             | Takeda 2018 ( <a href="#">Japan</a> ), Becker 2020 ( <a href="#">USA</a> ), Bardos 2017 ( <a href="#">USA</a> )                                                                                                                                                                                                                                                    |
| > 4%                                                       | 4             | Solt 2011 ( <a href="#">USA</a> ), Gulmezoglu 2006 ( <a href="#">Thailand</a> <sup>c</sup> ), Skinner 2017 ( <a href="#">Australia</a> ), Cottrell 2021 ( <a href="#">USA</a> )                                                                                                                                                                                    |
| Forceps rates (N=7 studies)                                |               |                                                                                                                                                                                                                                                                                                                                                                    |
| range                                                      | 0% to 5.2%    |                                                                                                                                                                                                                                                                                                                                                                    |
| < 1%                                                       | 3             | Bardos 2017 ( <a href="#">USA</a> ), Mogilevkina 2022 ( <a href="#">Ukraine</a> ), Takeda 2018 ( <a href="#">Japan</a> )                                                                                                                                                                                                                                           |
| 1-3%                                                       | 2             | Becker 2020 ( <a href="#">USA</a> ), Cottrell 2021 ( <a href="#">USA</a> )                                                                                                                                                                                                                                                                                         |
| >3%                                                        | 2             | Skinner 2017 ( <a href="#">Australia</a> ), Solt 2011 ( <a href="#">USA</a> )                                                                                                                                                                                                                                                                                      |
| Overall AVB rates (N=5 studies, 6 data sets <sup>d</sup> ) |               |                                                                                                                                                                                                                                                                                                                                                                    |
| range                                                      | 1.8% to 11.3% |                                                                                                                                                                                                                                                                                                                                                                    |
| 1-3%                                                       | 3             | Dumont 2013 ( <a href="#">Senegal and Mali</a> <sup>e</sup> ), Berglund 2010 <sup>f</sup> ( <a href="#">Ukraine</a> )                                                                                                                                                                                                                                              |
| >3 to 4.9%                                                 | 1             | Becker 2020 ( <a href="#">USA</a> )                                                                                                                                                                                                                                                                                                                                |
| 5 to 10%                                                   | 0             |                                                                                                                                                                                                                                                                                                                                                                    |
| >10%                                                       | 2             | Cottrell 2021 ( <a href="#">USA</a> ), Solt 2011 ( <a href="#">USA</a> )                                                                                                                                                                                                                                                                                           |
| Overall CS rates (N=12 studies)                            |               |                                                                                                                                                                                                                                                                                                                                                                    |
| range                                                      | 2.6% to 30.6% |                                                                                                                                                                                                                                                                                                                                                                    |
| < 10 %                                                     | 3             | Dmello 2021 ( <a href="#">Tanzania</a> ), Geelhoed 2018 ( <a href="#">Mozambique</a> ), Mogilevkina 2022 <sup>g</sup> ( <a href="#">Ukraine</a> )                                                                                                                                                                                                                  |
| 11-20%                                                     | 1             | Dominico 2018 ( <a href="#">Tanzania</a> )                                                                                                                                                                                                                                                                                                                         |
| 21-30%                                                     | 6             | Ameh 2014 ( <a href="#">Kenya</a> ), Solt 2011( <a href="#">USA</a> ), Takeda 2018 ( <a href="#">Japan</a> ), Bardos 2017 ( <a href="#">USA</a> ), Nolens 2016 ( <a href="#">Uganda</a> ), Berglund 2010 <sup>f</sup> ( <a href="#">Ukraine</a> )                                                                                                                  |
| >30%                                                       | 2             | Cottrell 2021 ( <a href="#">USA</a> ), Becker 2020 ( <a href="#">USA</a> )                                                                                                                                                                                                                                                                                         |

<sup>a</sup> In studies with >1 time point, we present the lowest AVB rate and the highest CS rate before intervention. <sup>b</sup> One study (Gulmezoglu 2006) conducted in two countries (Mexico & Thailand) analyzed separately. <sup>c</sup> Gulmezoglu 2006 (randomized trial): rates in control groups. <sup>d</sup> One study (Dumont 2013) conducted in two countries (Senegal & Mali). <sup>e</sup> Dumont 2013 (cluster randomized trial): rates in control groups. <sup>f</sup> Berglund 2010: combined rates from three sites. <sup>g</sup> Mogilevkina 2022 (non-randomized trial): rate in control group.

AVB: Assisted vaginal birth; CS: Cesarean section; VE: Vacuum extraction
